# Supplementary material for: Host diet shapes functionally differentiated gut microbiomes in sympatric speciation of blind mole rats in Upper Galilee, Israel
Source: Front Microbiol. 2022 Nov 15;13:1062763. doi: 10.3389/fmicb.2022.1062763 (PMC9707624; doi:10.3389/fmicb.2022.1062763)
Supplement: Supplementary file 3 [file Table_3.XLSX]

## Sheet: Sheet1
Supplementary Table 4 Sympatric divergence of the single bacteria, FST , and nucleotide diversity (π) were calculated.
Species	Fst	π(Basalt)	π(Chalk)	p-value
Flavonifractor plautii	0.0300955	0.0137983	0.0139654	0.8212
Flintibacter sp. KGMB00164	0.0245455	0.0132349	0.0135046	0.7093
Acutalibacter muris	0.0259504	0.00648596	0.00654529	0.9179
Lachnoclostridium sp. YL32	0.0317422	0.00506491	0.00515069	0.8449
Oscillibacter sp. NSJ-62	0.0263308	0.00925679	0.00957596	0.637
Faecalibacterium prausnitzii	0.0315162	0.00339044	0.00346744	0.8443
Intestinimonas butyriciproducens	0.029634	0.00963217	0.00951967	0.8699
Oscillibacter valericigenes	0.0287431	0.00475963	0.00478733	0.9463
Enterocloster bolteae	0.0288752	0.00483575	0.00475985	0.9007
Roseburia intestinalis	0.0362071	0.00433664	0.00423365	0.8267
Lachnoclostridium phocaeense	0.0329362	0.0056812	0.00568451	0.9964
Blautia producta	0.0322047	0.00262693	0.0026873	0.8555
Dysosmobacter welbionis	0.0268966	0.0113622	0.0115987	0.7194
Paenibacillus larvae	0.045037	0.00169444	0.0017666	0.878
Akkermansia muciniphila	0.0389338	0.00260679	0.00270624	0.8826
Christensenella minuta	0.0473247	0.00129823	0.00136105	0.8236
Clostridium autoethanogenum	0.0731339	0.00215198	0.00216087	0.9925
Clostridium innocuum	0.0295273	0.00441986	0.0044931	0.9268
Enterobacter hormaechei	0.0384558	0.00075603	0.00076393	0.9346
Stenotrophomonas sp. CW117	0.0346923	0.00159648	0.00156964	0.9413
